# Supplementary material
Source: HighWire-hosted journal article supplement (http://ghspjournal.org/highwire/filestream/1951/field_highwire_adjunct_files/2/16-00395-Rosen-Supplement3.pdf)
Supplement: 16-00395-Rosen-Supplement3.pdf [file 16-00395-Rosen-Supplement3.pdf]

### **SUPPLEMENT 3.** Methodology for Sensitivity Analysis

We identified the throughput, cost, and performance parameters holding a substantial degree of uncertainty (see Table, next page). For each parameter, we assumed an underlying normal distribution of possible values. We defined our base case assumption as the mean of this distribution and assigned a standard deviation, minimum, and maximum based on either (1) a reasonable notion of the range of possible values that the parameter might take, or (2) on the 95% confidence interval for the sample parameter distribution. Next, for the baseline and round 1 values, we allowed each of these parameters, simultaneously, to vary randomly; each time calculating a total cost, total throughput, performance, and associated cost and cost-effectiveness measures. We repeated this procedure 10,000 times and derived a mean, standard deviation, and 95% confidence intervals for cost and cost-effectiveness measures.

**TABLE. Throughput and Cost Parameters Used in the Sensitivity Analysis (US\$)**

| Parameter                                                    | Mean (base) | SD        | Minimum                             | Maximum                             |
|--------------------------------------------------------------|-------------|-----------|-------------------------------------|-------------------------------------|
| Storage cost                                                 | 6.00        | 1.00      | 5.00                                | 10.00                               |
| <b>SDP storage space estimates, baseline (m<sup>2</sup>)</b> |             |           |                                     |                                     |
| Dispensary                                                   | 12.00       | 31.24     | 9.60                                | 14.40                               |
| Health center                                                | 20.00       | 35.53     | 12.40                               | 27.60                               |
| District hospital                                            | 56.00       | 62.15     | 14.56                               | 97.44                               |
| <b>SDP storage space estimates, round 1 (m<sup>2</sup>)</b>  |             |           |                                     |                                     |
| Dispensary                                                   | 12.00       | 13.71     | 10.56                               | 13.44                               |
| Health center                                                | 20.00       | 16.48     | 14.20                               | 25.80                               |
| District hospital                                            | 132.00      | 21.07     | 108.24                              | 155.76                              |
| <b>Supply chain performance</b>                              |             |           |                                     |                                     |
| <i>Stock-out rate, baseline</i>                              |             |           |                                     |                                     |
| EPI baseline performance                                     | 23%         | 45%       | 18%                                 | 27%                                 |
| HIV baseline performance                                     | 27%         | 45%       | 25%                                 | 30%                                 |
| Other ILS baseline performance                               | 40%         | 49%       | 38%                                 | 42%                                 |
| Malaria baseline performance                                 | 39%         | 49%       | 37%                                 | 41%                                 |
| Family planning baseline performance                         | 32%         | 47%       | 30%                                 | 35%                                 |
| <i>Stock-out rate, round 1</i>                               |             |           |                                     |                                     |
| HIV round 1 performance                                      | 19%         | 39%       | 17%                                 | 21%                                 |
| Other ILS round 1 performance                                | 23%         | 42%       | 21%                                 | 25%                                 |
| Malaria round 1 performance                                  | 22%         | 42%       | 20%                                 | 24%                                 |
| Family planning round 1 performance                          | 25%         | 43%       | 23%                                 | 27%                                 |
| <b>SDP, district, and regional costs</b>                     |             |           |                                     |                                     |
| All surveyed SPD, district, and regional costs, baseline     | Sample mean | Sample SD | 95% CI around mean                  | 95% CI around mean                  |
| All surveyed SPD, district, and regional costs, round 1      | Sample mean | Sample SD | 95% CI around mean                  | 95% CI around mean                  |
|                                                              | <b>Mean</b> | <b>SD</b> | <b>Min value as % of base value</b> | <b>Max value as % of base value</b> |
| Throughput value                                             | 0%          | 4%        | -10%                                | 10%                                 |

Abbreviations: CI, confidence interval; EPI, Expanded Programme on Immunization; ILS, integrated logistics system; SD, standard deviation; SDP, service delivery point.
